# Supplementary material for: Osteopontin attenuates aging‐associated phenotypes of hematopoietic stem cells
Source: PubMed Central journal article supplement — EMBO J. 2017 Mar 2;36(7):840–53. doi: 10.15252/embj.201694969 (PMC5376966; doi:10.15252/embj.201694969), 2017-03-02
Supplement: EMBJ-36-840-s001.pdf [file EMBJ-36-840-s001.pdf]

# **Osteopontin attenuates aging-associated phenotypes of hematopoietic stem cells**

**Guidi et al.**

## **Appendix**

### **Table of contents:**

Appendix Figures S1-S3

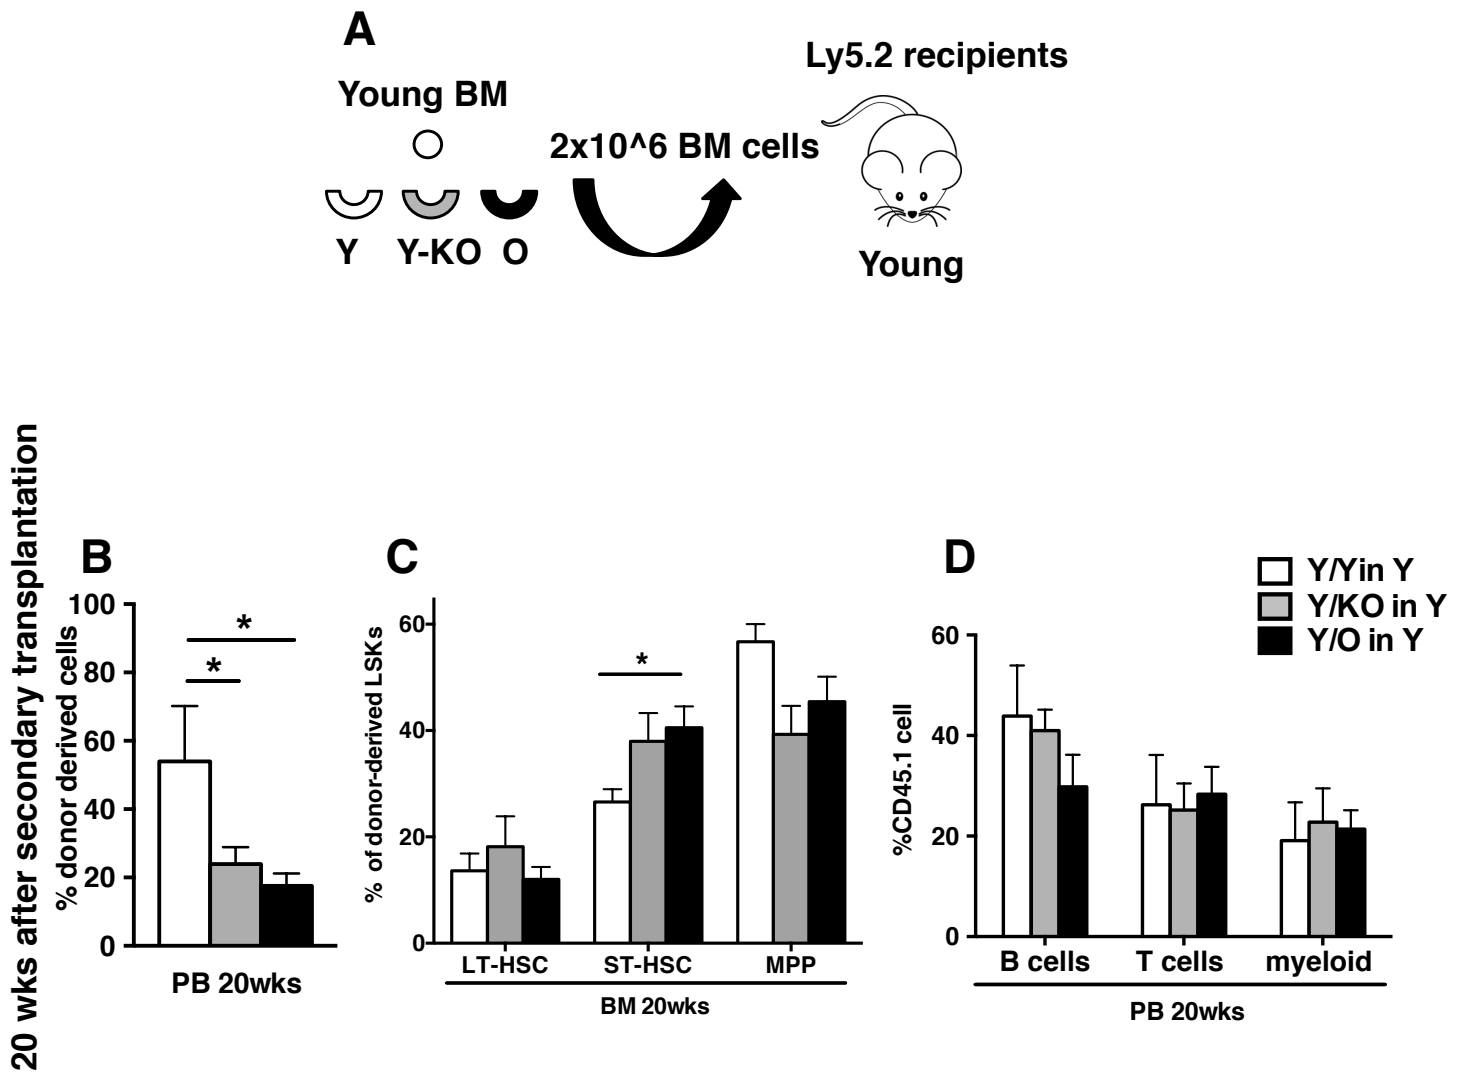

Appendix Figure S1. **Aging associated phenotypes of LT-HSC are attenuated upon secondary transplantation in young mice (A)** Schematic representation of the experimental setup **(B)** Frequency of young donor contribution (Ly5.1+ cells) to total WBC in PB in young recipients (Ly5.2+) mice. **(C)** Frequency of young LT-HSC, ST-HSC, and MPP cells in BM among donor-derived LSKs cells in young recipients (Ly5.2+) mice. **(D)** Frequency of young B cells (B220+), T cells (CD3+), and myeloid cells among donor-derived Ly5.1+ cells in PB in young recipients (Ly5.2+) mice (n=4-10 mice per group). Shown are means values + 1 SEM, \*p<0.05.

Appendix Figure S1.

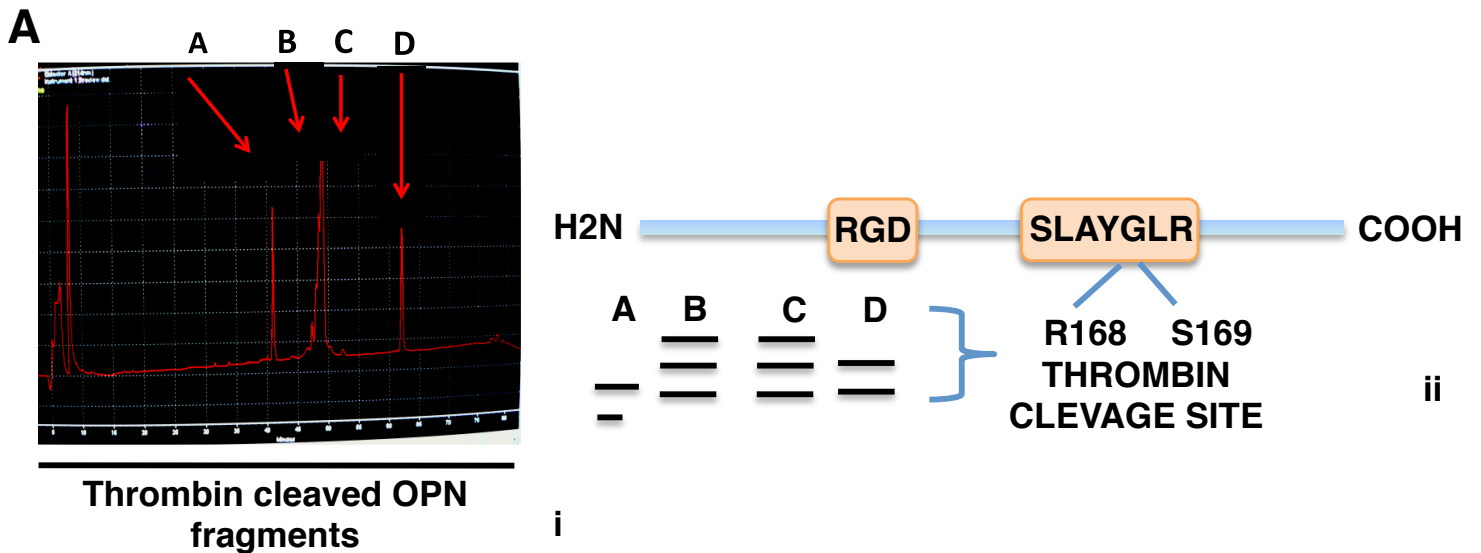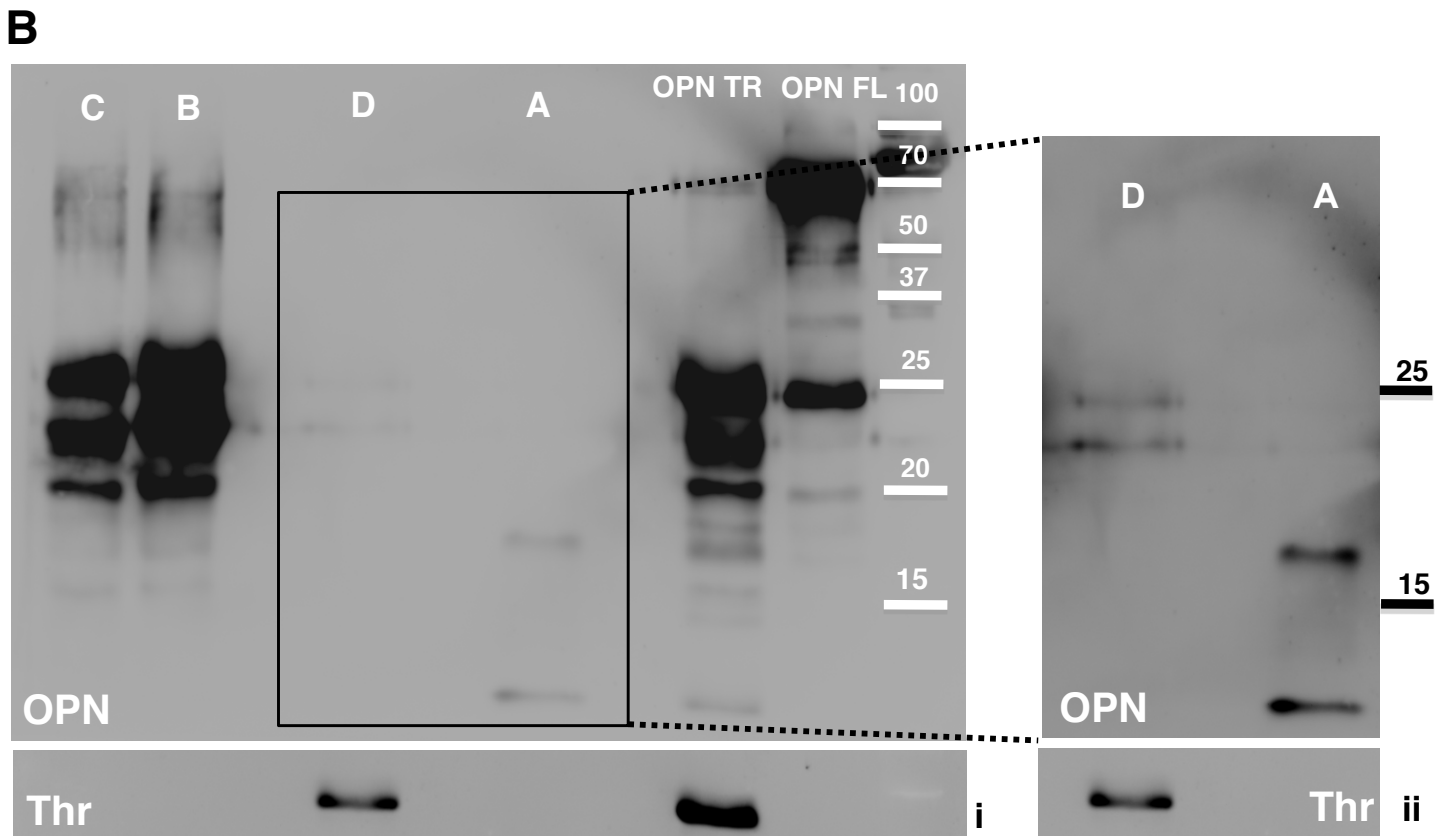

Appendix Figure S2. **OPN-cleaved fragments characterization.** **(A)** **(i)** Representative chromatogram of the thrombin digested OPN.  $n=3$ . Picks represent the main digested fragments. **(ii)** Schematic representation of osteopontin structure showing the generated fragments by a specific Thrombin cleavage: 4 main fragments with different size were generated **(B)** **(i)** Western blot analysis was performed for all the OPN fractions generated to evaluate their molecular size compare to control samples OPN FL and OPN TR. **(ii)** Representative bands for fraction D and A.

Appendix Figure S2.

**A**

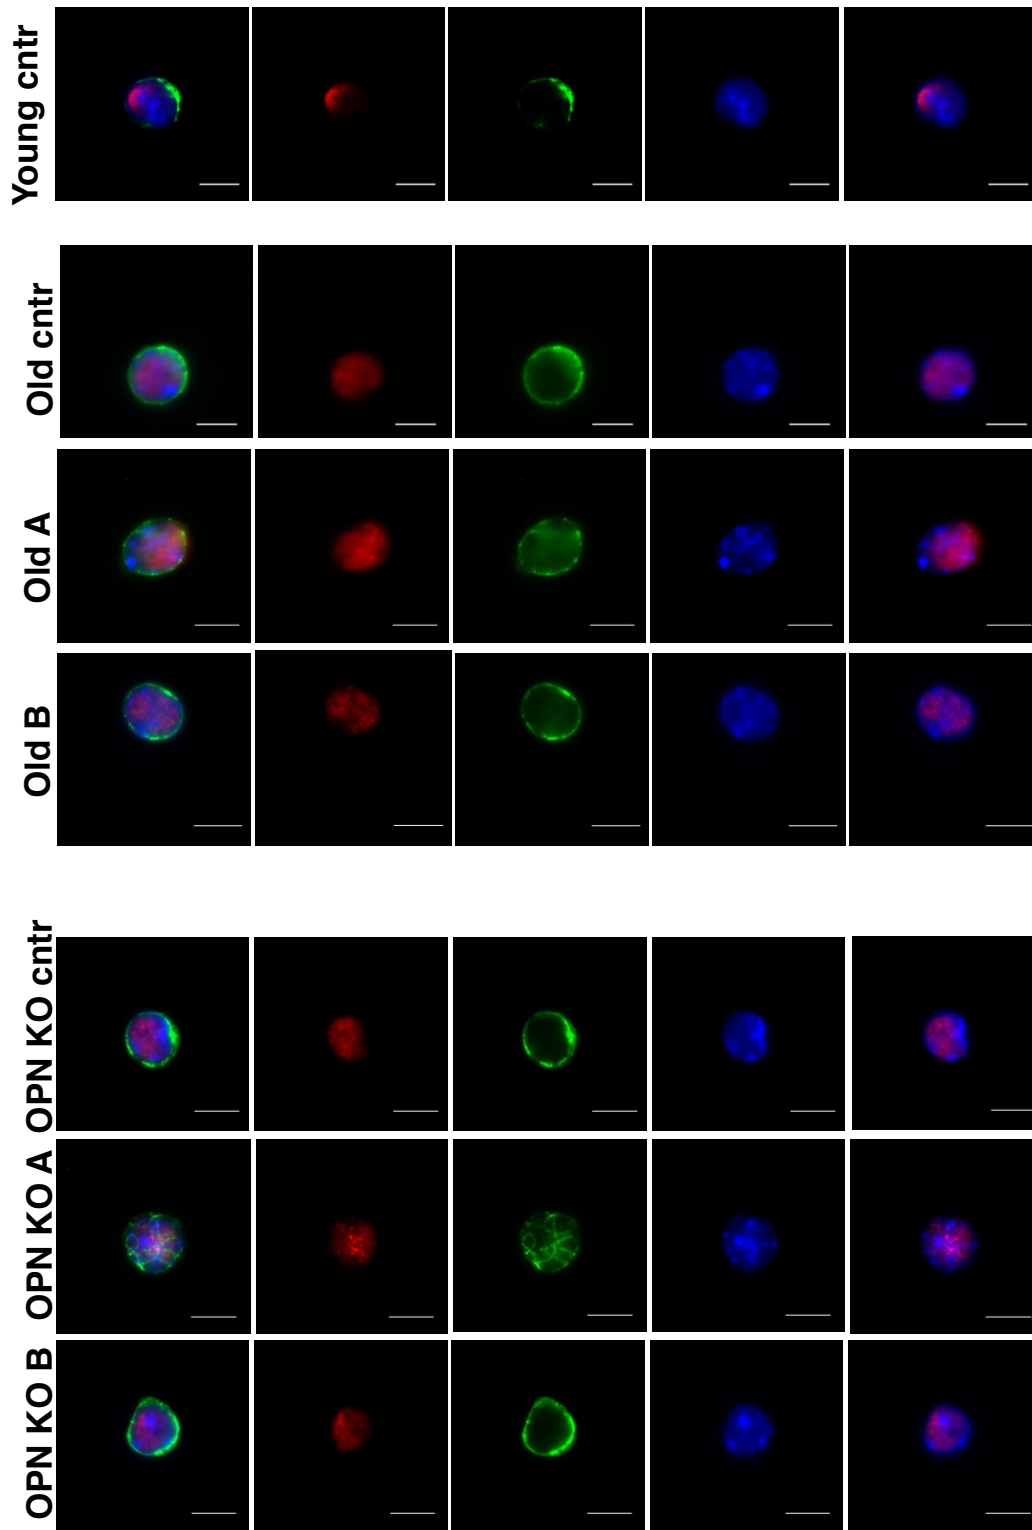

Appendix Figure S3.

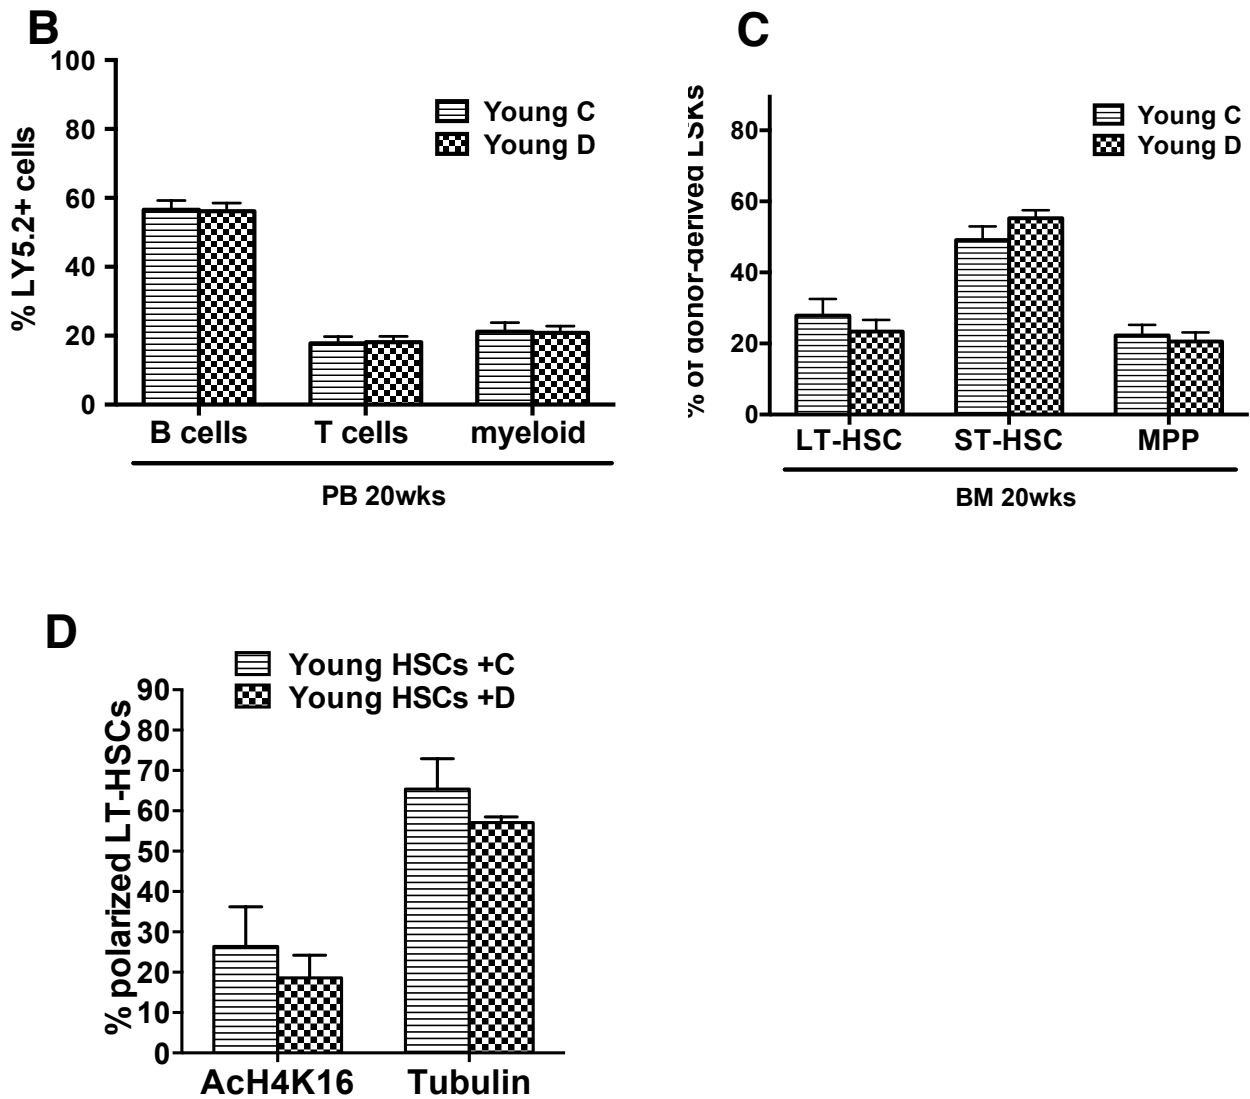

Appendix Figure S3. **OPN fraction A and B does not re-polarize old and OPN KO LT-HSCs and ex-vivo treatment with OPN fraction C and D does not alter young LT-HSC function upon transplantation.** (A) Representative distribution of Ach4k16 (red) and tubulin (green) in old, old treated with fraction A, and old treated with fraction B LT-HSCs (same treatment condition for OPN KO LT-HSCs). Nuclei are stained with DAPI (blue). Bar=5  $\mu$ m. (B) Frequency of young, young with fraction C and young with fraction D, B cells (B220+), T cells (CD3+) and myeloid cells among donor-derived Ly5.2+ cells in PB in young recipients (Ly5.1+) mice. (C) Frequency of young, young with fraction C and young with fraction D LT-HSC, ST-HSC and MPP cells in BM among donor-derived LSKs cells in young recipients (Ly5.1+) mice. (D) Percentage of LT-HSCs polarized for Ach4K16 and tubulin in donor-derived LT-HSCs (Ly5.2+ cells) sorted from the young, young with fraction C and young with fraction D experimental groups 20 weeks after transplant. ~40 cells scored per sample in each experimental repetitions ( n =3).

Appendix Figure S3.
