# Supplementary material for: Osteopontin attenuates aging‐associated phenotypes of hematopoietic stem cells
Source: PubMed Central journal article supplement — EMBO J. 2017 Mar 2;36(7):840–53. doi: 10.15252/embj.201694969 (PMC5376966; doi:10.15252/embj.201694969), 2017-03-02
Supplement: EMBJ-36-840-s002.pdf [file EMBJ-36-840-s002.pdf]

## Expanded View Figures

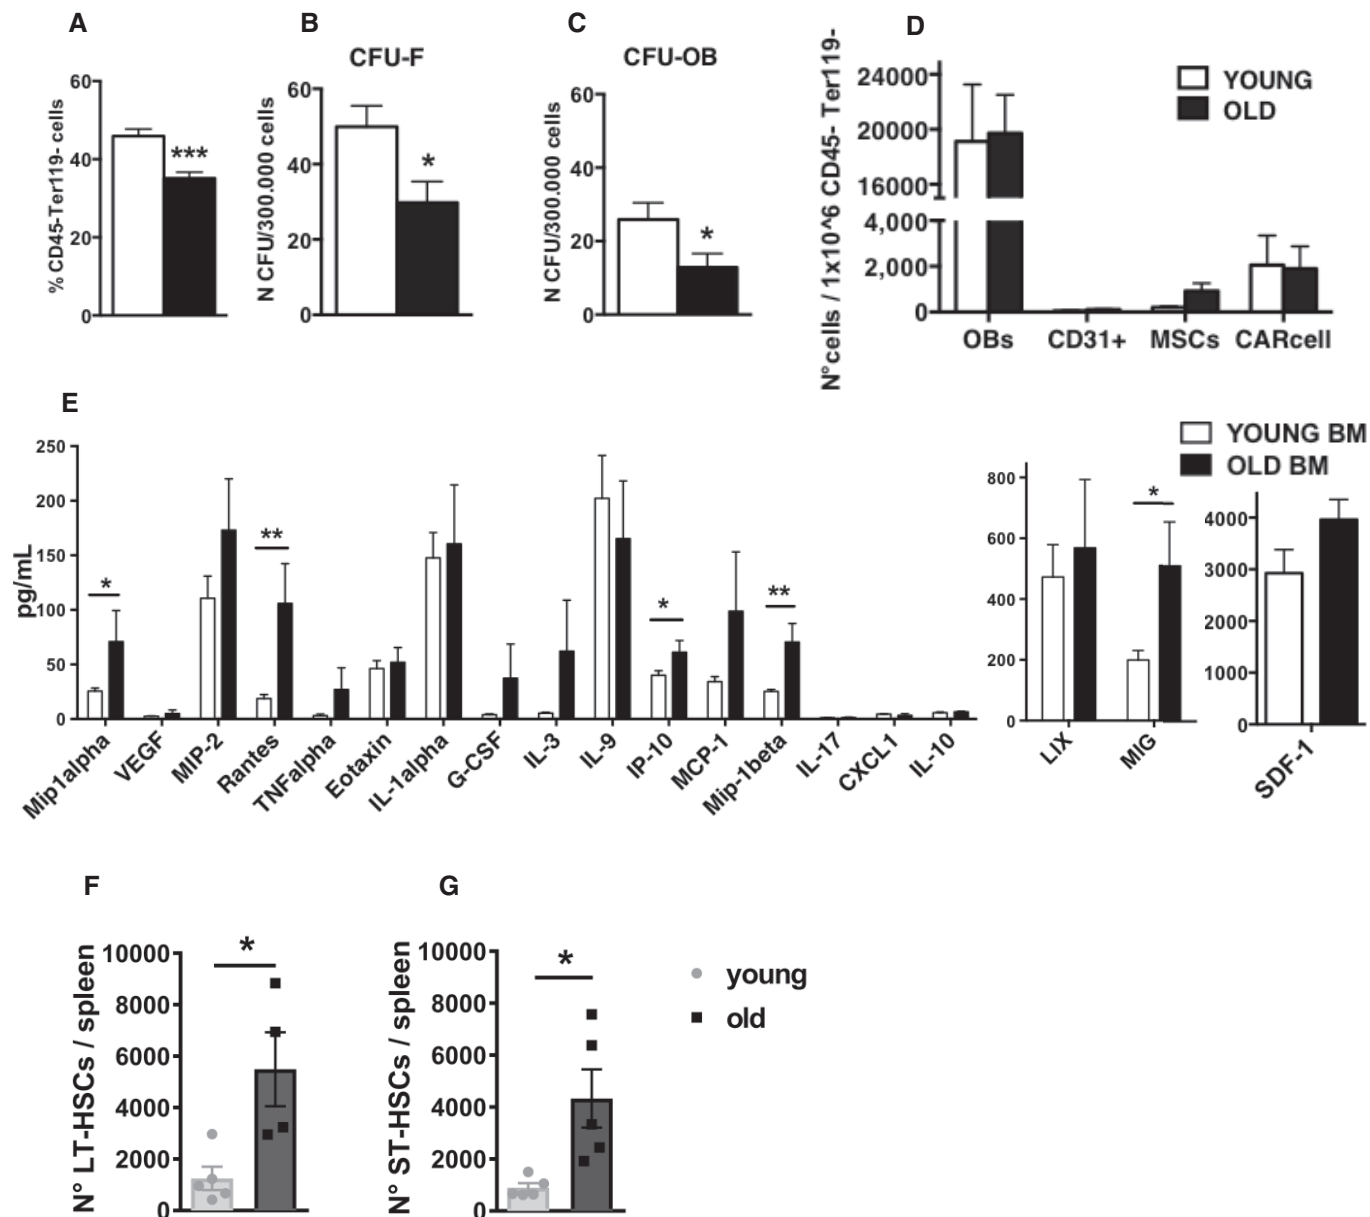

**Figure EV1. BM niche microenvironment changes upon aging with respect to decreased cell frequency, decreased CFU-F/OB ability and altered cytokines secretion.**

A Relative frequency of CD45<sup>+</sup> Ter119<sup>-</sup> cells (endosteal-enriched stroma population) in the cell fraction close to the endosteum in young and aged mice (*n* = 9).

B, C Frequency of CFU-F (B) and CFU-OB (C) among 300,000 young or old cells isolated from the endosteal bone region (*n* = 4).

D Relative frequency of osteoblasts OBs, CD31<sup>+</sup> endothelial cells, MSCs and CAR cells in BM central stroma population of young and old mice (*n* = 5).

E Concentration of cytokines in the BM supernatant of young and old mice (*n* = 3).

F, G Numbers of LT-HSCs (F) and ST-HSCs (G) in spleen of young and old mice (*n* = 4–5 per group).

Data information: A paired Student's *t*-test was used to determine the significance of the difference between means of the two groups. Shown are mean values + 1 s.e.m. \**P* < 0.05, \*\**P* < 0.01, \*\*\**P* < 0.001.

**Figure EV2. OPN staining in stroma OBs, CD31<sup>+</sup> endothelial cells, CAR<sup>+</sup> cells and MSCs.**

- A Relative frequency of left over endosteal-enriched stroma population OPN-positive nonosteoblasts, CD31<sup>+</sup> endothelial cells, MSCs and CAR cells of young and old mice ( $n = 4$ ).
- B Representative immunofluorescence three-dimensional images of DAPI (blue) and OPN (red) localization in young and old CAR<sup>+</sup> cells (scale bar 1.40  $\mu\text{m}$ ), CD31<sup>+</sup> endothelial (scale bar 1.80  $\mu\text{m}$ ) and MSCs (scale bar 1.90  $\mu\text{m}$ ) with relative OPN signal volume quantification. Representative of two experiments with ~15–20 cells scored per sample in each experimental repetition.
- C Relative frequency of OPN-positive osteoblasts in endosteal-enriched stroma population of young and old mice ( $n = 4$ ).
- D Representative plot showing specificity of the anti-OPN antibody in young, old and OPN KO endosteal-enriched stroma population.

Data information: A paired Student's  $t$ -test was used to determine the significance of the difference between means of the two groups. Shown are mean values + 1 s.e.m. \* $P < 0.05$ .

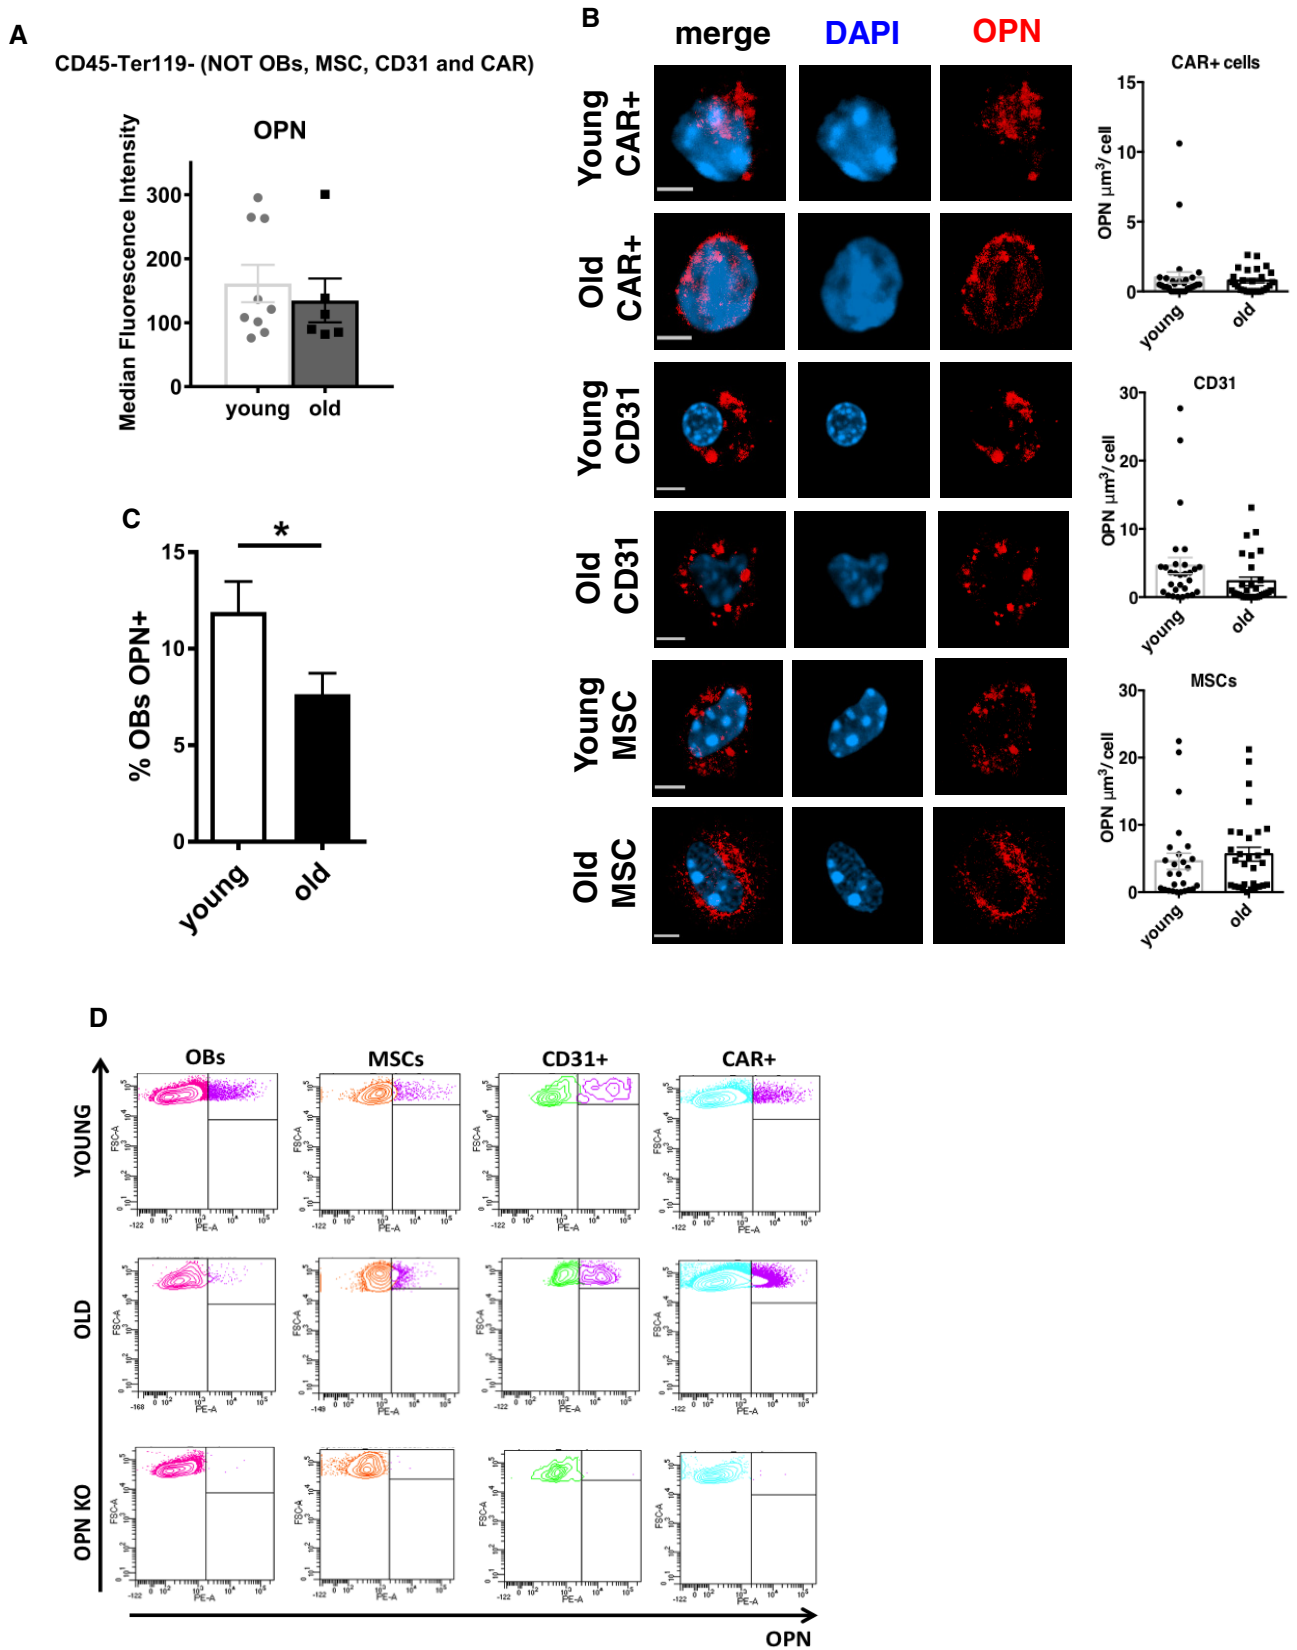

Figure EV2.

**Figure EV3. OPN<sup>-/-</sup> mice, like old mice, show decreased OB number, increase in inflammatory cytokines and increase in LT-HSCs with associated apolarity.**

- A, B Frequency of young LT-HSCs Ly5.1<sup>+</sup> Annexin V negative (A) and BrdU<sup>+</sup> (B) co-cultured onto young, young OPN KO and old endosteal-enriched stroma population ( $n = 6$ ).
- C Relative frequency of osteoblasts, CD31<sup>+</sup> endothelial cells, MSCs and CAR cells in endosteal-enriched stroma population of young, old and young OPN KO mice ( $n = 6-7$ ).
- D Concentration of cytokines in the BM supernatant of young, old and young OPN KO mice ( $n = 3$ ).
- E Number of LT-HSCs per mouse sorted from young, old and young OPN KO mice ( $n = 8$ ).
- F Representative distribution of AcH4k16 (red) and tubulin (green) in LT-HSCs sorted from young, old and young OPN knockout mice (Ly5.2 background). Nuclei are stained with DAPI (blue). Scale bar, 5  $\mu$ m. Merged pictures on a dark background are shown.

Data information: Two-way ANOVA statistic test was used to compare means among the three groups. Shown are mean values + 1 s.e.m. \* $P < 0.05$ , \*\* $P < 0.01$ .



**Figure EV4. Increased HSCs number in OPN<sup>-/-</sup> mice present with augmented Cdc42 activity and premature lineage skewing.**

- A Frequency of LT-HSCs polarized for ACh4K16 and tubulin sorted from young, old and young OPN KO mice.  $n = 6$ ; ~40 cells scored per sample in each experimental repetition.
- B Cdc42 activity in young, old and young OPN KO lineage-depleted bone marrow cells (Lin<sup>-</sup> BM) was determined by pull-down/Western blot assay. Active Cdc42 (Cdc42-GTP) was normalized with respect total Cdc42 and actin.
- C Ratio of the densitometric score of the Cdc42-GTP form and the total Cdc42 expression from panel (B),  $n = 5$ .
- D Number of LT-HSCs per mouse sorted from young, old (24 months), young OPN KO mice and old OPN KO (18 months) (Ly5.2<sup>+</sup>) mice ( $n = 5-8$ ).
- E Frequency of B cells, T cells, and myeloid cells in BM in young, old (24 months), young OPN KO and old OPN KO (18 months) (Ly5.2<sup>+</sup>) mice ( $n = 5$ ).
- F Frequency of MEPs, CMPs, GMPs and CLPs progenitors in BM cells in young, old (24 months), young OPN KO and old OPN KO (18 months) (Ly5.2<sup>+</sup>) mice ( $n = 5$ ).
- G Schematic representation of the experimental setup: the recipient mice were analyzed after 15 h from the cell injection.
- H Cartoon demonstrating processing of the bones for analysis.
- I Ratio of CFSE<sup>+</sup> HSPCs per section (3-4 biological repeats/group). Average HSPC numbers scored/mouse in young  $n = 39$ , old  $n = 63$  and OPN KO = 70 in three biological repeats.

Data information: Two-way ANOVA statistic test was used to compare means among the three groups. Shown are mean values + 1 s.e.m. \* $P < 0.05$ , \*\* $P < 0.01$ , \*\*\* $P < 0.001$ .

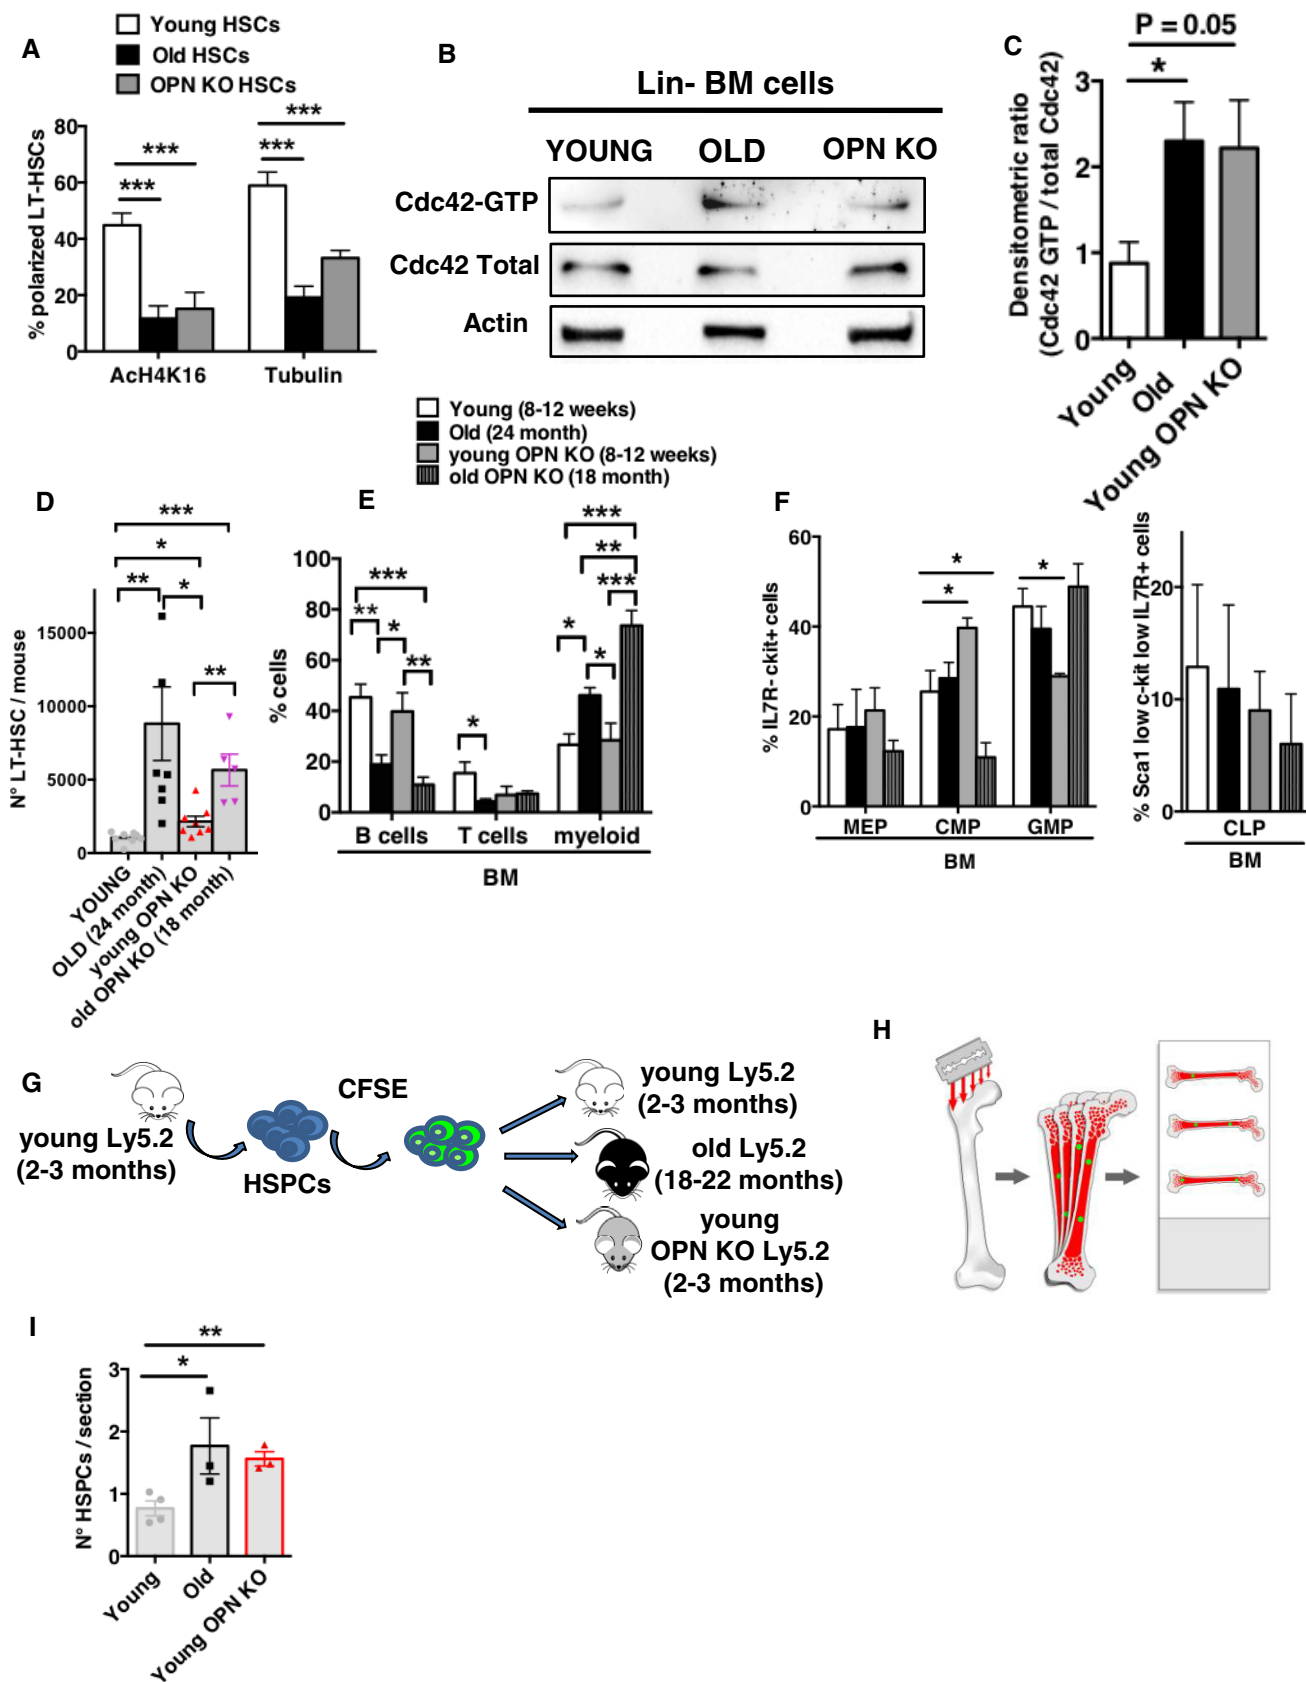

Figure EV4.

**Figure EV5. A young stroma microenvironment supports the increase in old MPPs *in vitro* and the decrease in old CMPs *in vivo*.**

- A Schematic representation of the experimental setup.
- B Concentration of OPN in the co-culture supernatant of old BM lineage negative onto young, young OPN KO and old endosteal-enriched stroma population ( $n = 4$ ).
- C–E Number of old LT-HSCs (C), ST-HSCs (D) and MPPs (E)  $\text{Ly5.1}^+$  onto young, young OPN KO and old endosteal-enriched stroma population ( $n = 4$ ).
- F, G Frequency of old LT-HSCs  $\text{Ly5.2}^+$  Annexin V negative (F) and  $\text{BrdU}^+$  (G) co-cultured onto young, young OPN KO and old endosteal-enriched stroma population ( $n = 4$ ).
- H, I Frequency of young (H) and old (I) ( $\text{Ly5.1}^+$ ) MEPs, CMPs, GMPs and CLPs progenitors in BM cells in young, old and young OPN KO recipients ( $\text{Ly5.2}^+$ ) mice after 20 weeks upon transplantation. Data are based on six experimental repeats with five recipient mice per group (e.g.,  $n = 25\text{--}30$  per group).

Data information: Two-way ANOVA statistic test was used to compare means among the three different groups. Shown are mean values  $\pm 1$  s.e.m. \* $P < 0.05$ , \*\* $P < 0.01$ , \*\*\* $P < 0.001$ .



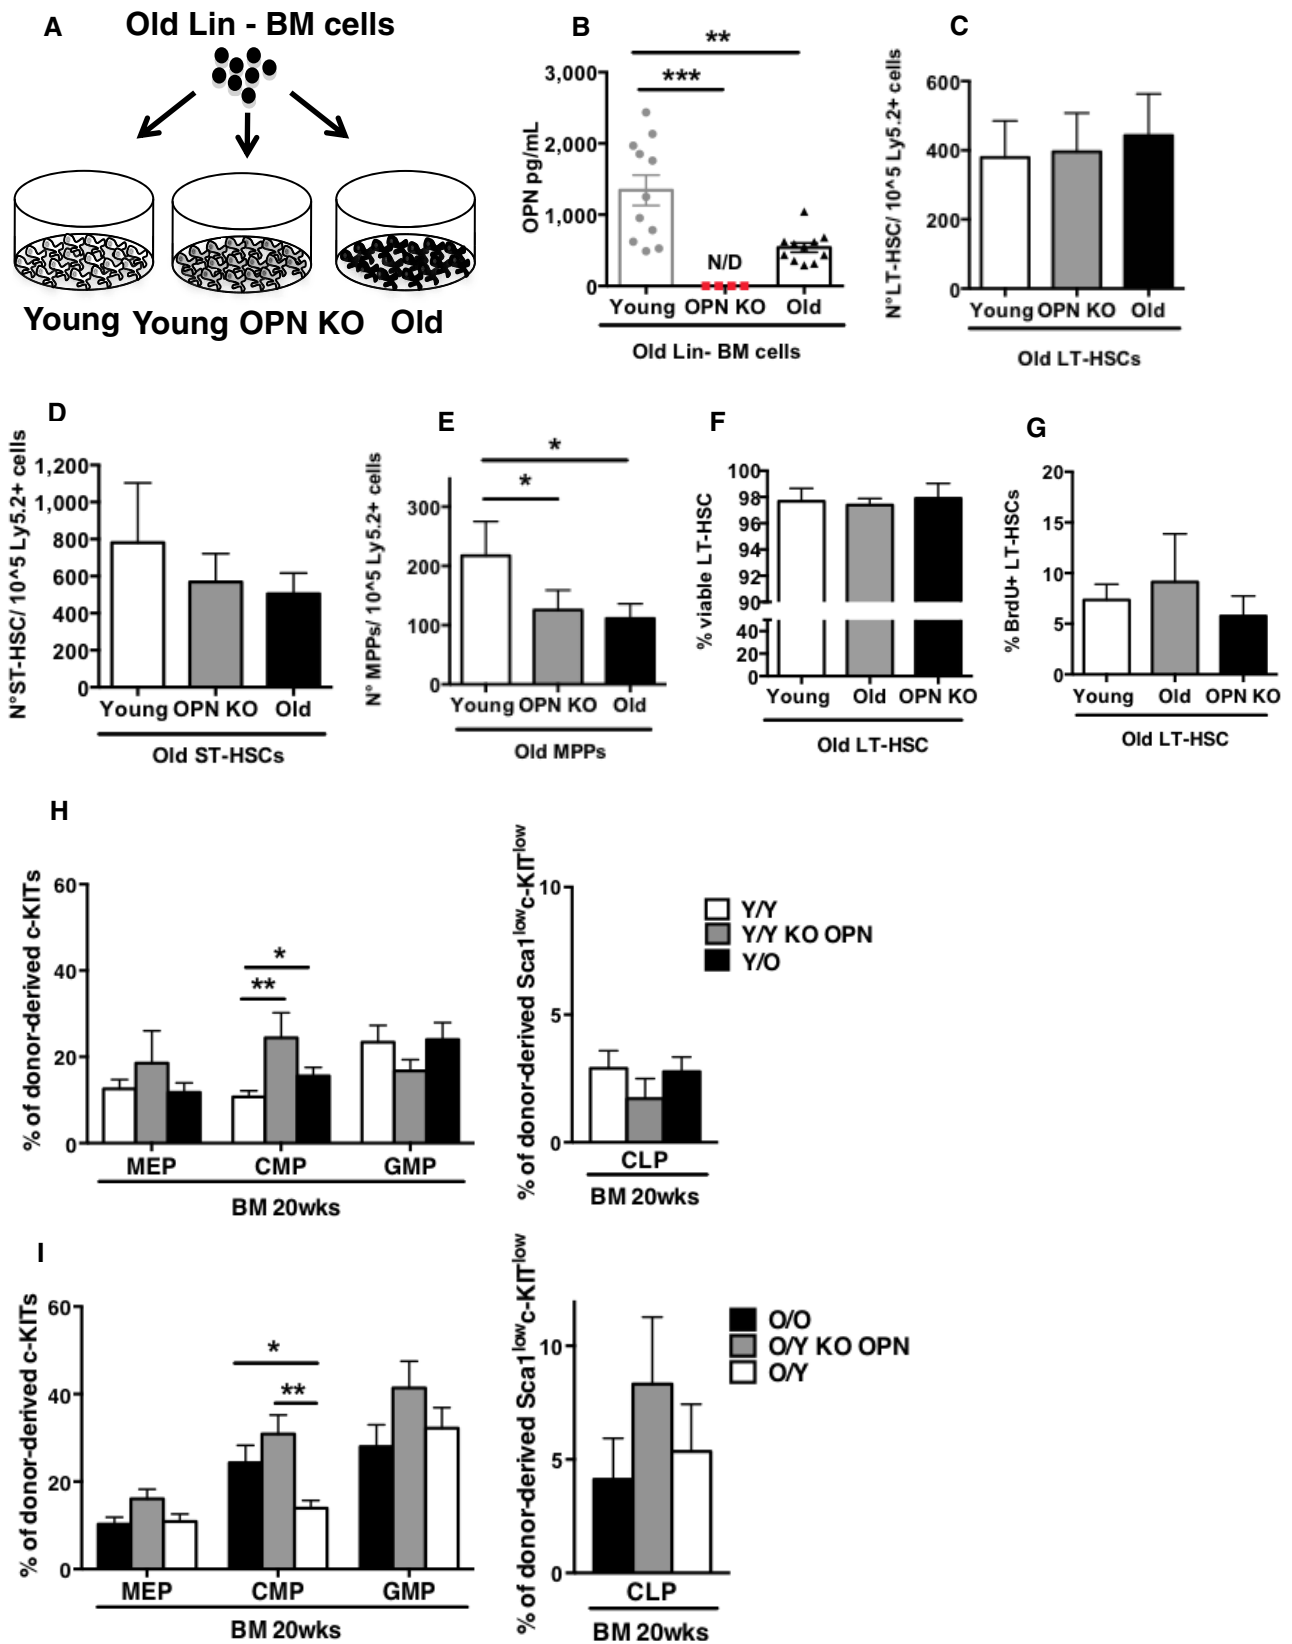

Figure EV5.

**Figure EV6. OPN fragments 20–25 kDa re-polarize old LT-HSCs.**

- A OPN fraction D (20–25 kDa) sequence after enzymatic digestion. In blue, the thrombin cleavage site is shown. (ii) Chromatogram of the second digestion of fraction D with 8 M urea.
- B Western blot analysis of all the fractions obtained from the digestion of fraction D. Antibodies anti-OPN and anti-thrombin were used.
- C All the subfractions were tested on LT-HSCs. Percentage of LT-HSCs polarized for AcH4K16 and tubulin are shown for all the experimental groups.  $n = 3$ . ~40 cells scored per sample in each experimental repetition.
- D Percentage of LT-HSCs polarized for AcH4K16 and tubulin in the experimental groups listed.  $n = 3$ ; ~30 cells scored per sample in each experimental repetition. The percentage of polarized cells is plotted over the total number of cells scored.

Data information: Two-way ANOVA statistic test was used to compare means among the different groups. Shown are mean values + 1 s.e.m. \* $P < 0.05$ , \*\* $P < 0.01$ , \*\*\* $P < 0.001$ .

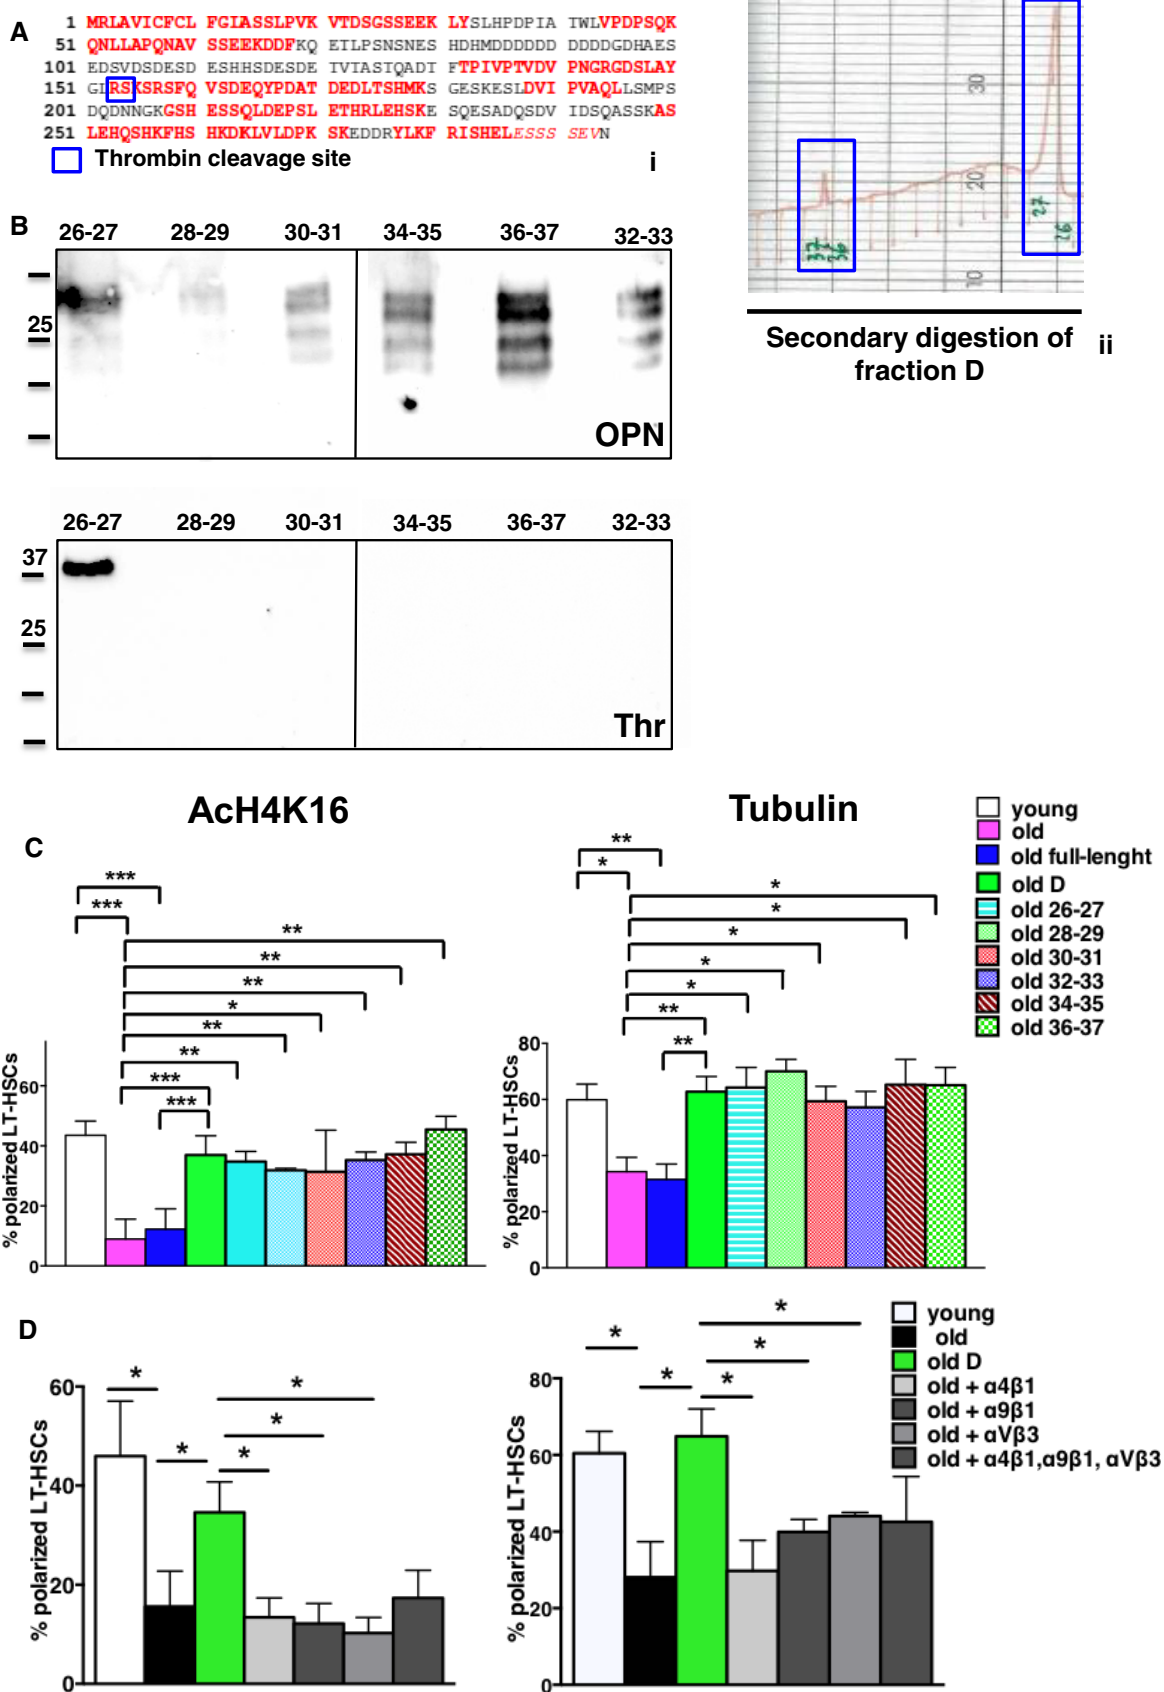

Figure EV6.
